# Supplementary material for: Identification of novel biomarkers for prediction of neurological prognosis following cardiac arrest
Source: PubMed Central journal article supplement (PMC5369953; doi:10.18632/oncotarget.14877), 2017-01-28
Supplement: oncotarget-08-16144-s001.pdf [file oncotarget-08-16144-s001.pdf]

## Identification of novel biomarkers for prediction of neurological prognosis following cardiac arrest

### Supplementary Figure 1

GSE29540

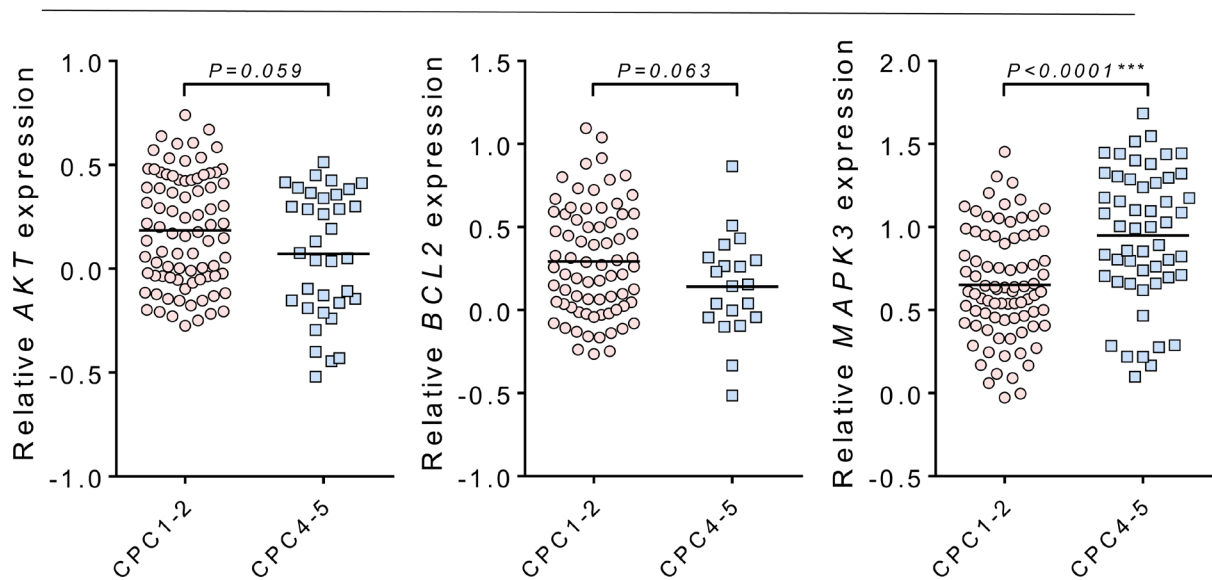

To validate the expression of *AKT1*, *BCL2*, and *MAPK3* in the large cohort of cardiac arrest patients, we recapitulated gene expression levels of *AKT1*, *BCL2*, and *MAPK3* in the datasets available from the NCBI, GEO database (GSE29540)
